# Supplementary material
Source: ML conference proceedings conference paper supplement (https://openreview.net/forum?id=vtLbsGUyYx)
Supplement: supplementary_material [file attachment]

# AUTOCoG: A UNIFIED DATA-MODAL CO-SEARCH FRAMEWORK FOR GRAPH NEURAL NETWORKS

**Anonymous authors**

Paper under double-blind review

## A APPENDIX

In this section, we outline the derived architectures from **AutoCoG** at all configurations for all datasets. Below you can find our experimental settings; next to it are the three tables, each outlines the architecture configurations for two layers, 16 layers, and 32 layers.

**Experimental settings.** We use the Adam optimizer for both model and architecture weights with a learning rate of 0.01, and 0.001 respectively.  $L_2$  regularization for the model’s weight is set to be 0.0005 as standard for Cora/Citeseer/Pubmed, and zero for ogbn-arxiv. We set dropout rates to be 0.6 for Cora and Citeseer; 0.5 for Pubmed; and 0.1 for ogbn-arxiv. For Identity-Mapping,  $\gamma$  is chosen to be 0.5 for Cora/Pubmed/ogbn-arxiv, and 0.6 for Citeseer. Following best practices, we set the hidden dimension to be 256 for Citeseer/Arxiv, and 64 for Pubmed/Cora. Number of head is one for all. In addition, we set the  $\eta$ , ratio between initial connection and current features, to be 0.1. For P-DARTS, we set  $N$  to be seven with an increment of two layers per stage. Finally, we allow our search and train to reach a maximum of 1000 epochs, while setting our patience to be 400, and 200 respectively.

Table 1: architectures derived for our 2 layers settings. the left most setting are for layer 1, while the right most settings are for layer 2.

| dataset    | data policy ( $p$ ) | attention  | activation        | skip                       |
|------------|---------------------|------------|-------------------|----------------------------|
| Cora       | DropNode (0.15)     | const, gat | tanh, tanh        | None, None                 |
| Citeseer   | DropNode (0.10)     | cos, gcn   | relu6, leaky relu | None, None                 |
| Pubmed     | Identity            | gcn, gcn   | tanh, tanh        | initial skip, initial skip |
| ogbn-arxiv | DropNode (0.15)     | gcn, gcn   | tanh, tanh        | inital skip, inital skip   |

Table 2: architectures derived for our 16 layers settings. The same setting is repeated across the depth of our model

| dataset    | data policy ( $p$ ) | attention | activation | skip         |
|------------|---------------------|-----------|------------|--------------|
| Cora       | DropNode (0.2)      | gcn       | linear     | initial skip |
| Citeseer   | Identity            | gcn       | tanh       | initial skip |
| Pubmed     | AddEdge (0.1)       | gcn       | tanh       | initial skip |
| ogbn-arxiv | DropNode (0.15)     | gcn       | tanh       | inital skip  |

Table 3: architectures derived for our 32 layers settings. The same setting is repeated across the depth of our model

| dataset    | data policy ( $p$ ) | attention | activation | skip         |
|------------|---------------------|-----------|------------|--------------|
| Cora       | AddEdge (0.15)      | gcn       | elu        | initial skip |
| Citeseer   | AddEdge (0.10)      | gcn       | tanh       | initial skip |
| Pubmed     | AddEdge (0.10)      | gcn       | tanh       | initial skip |
| ogbn-arxiv | DropNode (0.10)     | gcn       | tanh       | inital skip  |
